# Supplementary material
Source: PubMed Central journal article supplement (PMC3834147)
Supplement: supp_mol.113.089045_SUPP1_89045.pdf [file supp_mol.113.089045_SUPP1_89045.pdf]

Supplemental Figure 1

Title: Enzymatic Activity of CaMKII is not Required for its Interaction with the Glutamate Receptor Subunit GluN2B

Authors: Kelsey Barcomb, Steven J. Coultrap, and K. Ulrich Bayer

Journal: Molecular Pharmacology

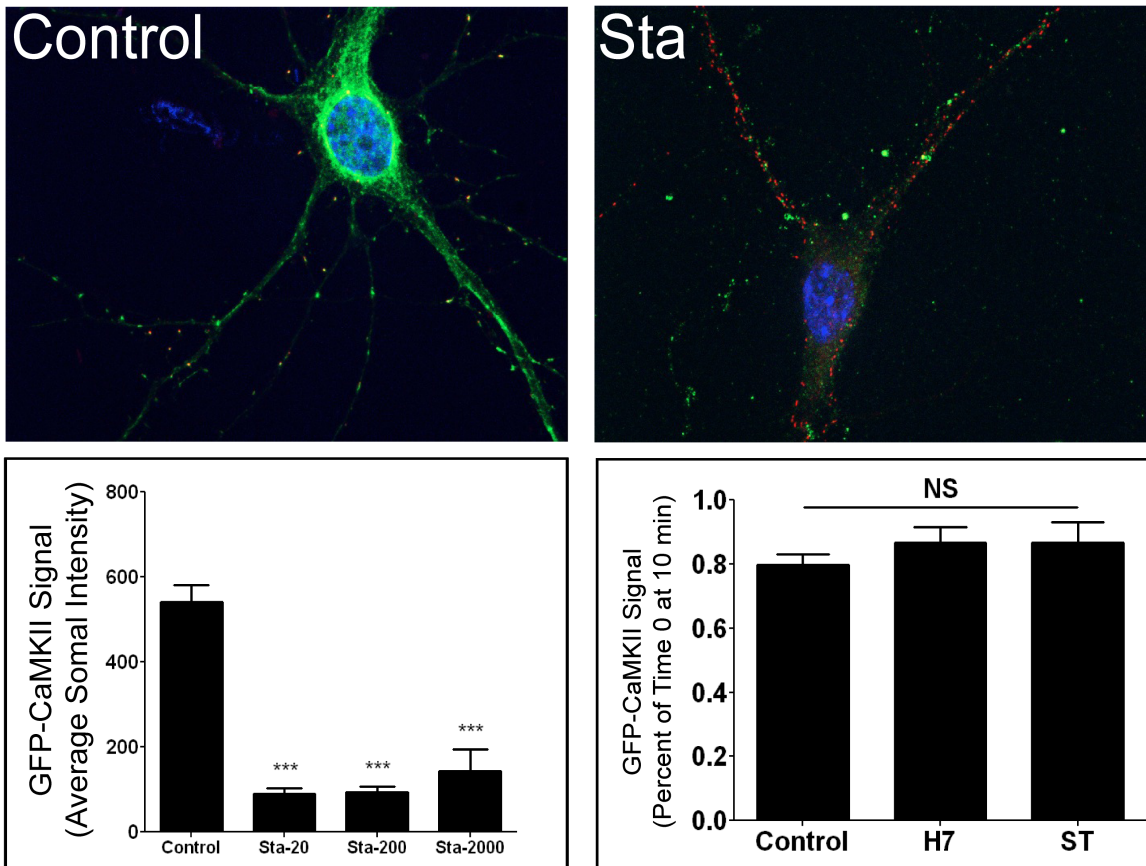

**Supplemental Figure S1:** Staurosporine reduced CaMKII immunostaining in fixed neurons (upper panels; quantification in left lower panel), but did not lead to degradation of GFP-CaMKII in live neurons (right lower panel). Reduced CaMKII immunostaining was observed with 20, 200, and 2000 nM staurosporine (Sta) (left lower panel). By contrast, in live neurons, neither 2000 nM Sta nor 700  $\mu$ M H7 reduced GFP-CaMKII levels (right lower panel).
